# Supplementary material for: Optimization of radiotherapy for neck carcinoma metastasis from unknown primary sites: a meta-analysis
Source: PubMed Central journal article supplement (PMC5346673; doi:10.18632/oncotarget.12852), 2016-10-24
Supplement: oncotarget-07-78736-s001.pdf [file oncotarget-07-78736-s001.pdf]

# Optimization of radiotherapy for neck carcinoma metastasis from unknown primary sites: a meta-analysis

## Supplementary Materials

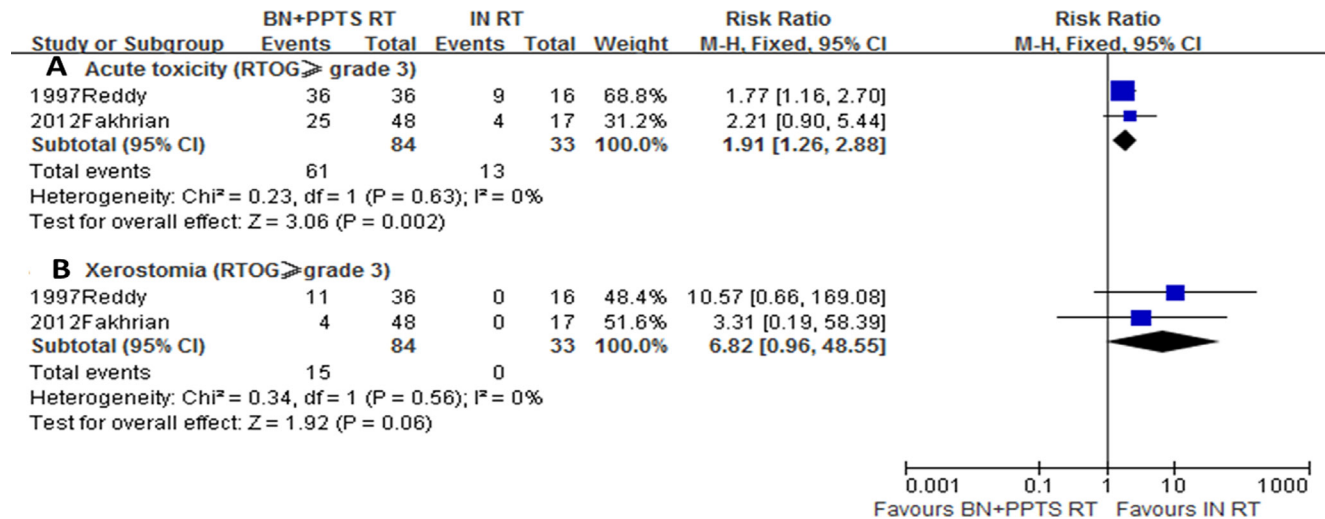

**Supplementary Figure S1: Meta-analysis of incidence of (A) acute toxicity (RTOG grade ≥ 3) and (B) xerostomia (RTOG grade ≥ 3) associated with different RT regimens.** RTOG, Radiation Therapy Oncology Group; IN, Ipsilateral neck; BN+PPTS, Bilateral neck plus potential primary mucosa sites; RT, Radiotherapy.
